# Supplementary material for: The Effect of UV-Vis Radiation on DNA Systems Containing the Photosensitizers Methylene Blue and Acridine Orange
Source: MDPI journal article supplement (doi:10.3390/biophysica4010002), 2024-01-12
Supplement: s1 [file s1]

# Low-energy radiation effect on the DNA in presence of Methylene Blue and Acridine Orange

Thais P. Pivetta <sup>1,2</sup>, Paulo A. Ribeiro <sup>2</sup> and Maria Raposo <sup>2,\*</sup>

<sup>1</sup> CEFITEC, Department of Physics, NOVA School of Science and Technology, Universidade NOVA de Lisboa, 2829-516 Caparica, Portugal; t.pivetta@campus.fct.unl.pt.

<sup>2</sup> Laboratory of Instrumentation, Biomedical Engineering and Radiation Physics (LIBPhys-UNL), Department of Physics, NOVA School of Science and Technology, Universidade NOVA de Lisboa, 2829-516 Caparica, Portugal; t.pivetta@campus.fct.unl.pt; pfr@fct.unl.pt; mfr@fct.unl.pt.

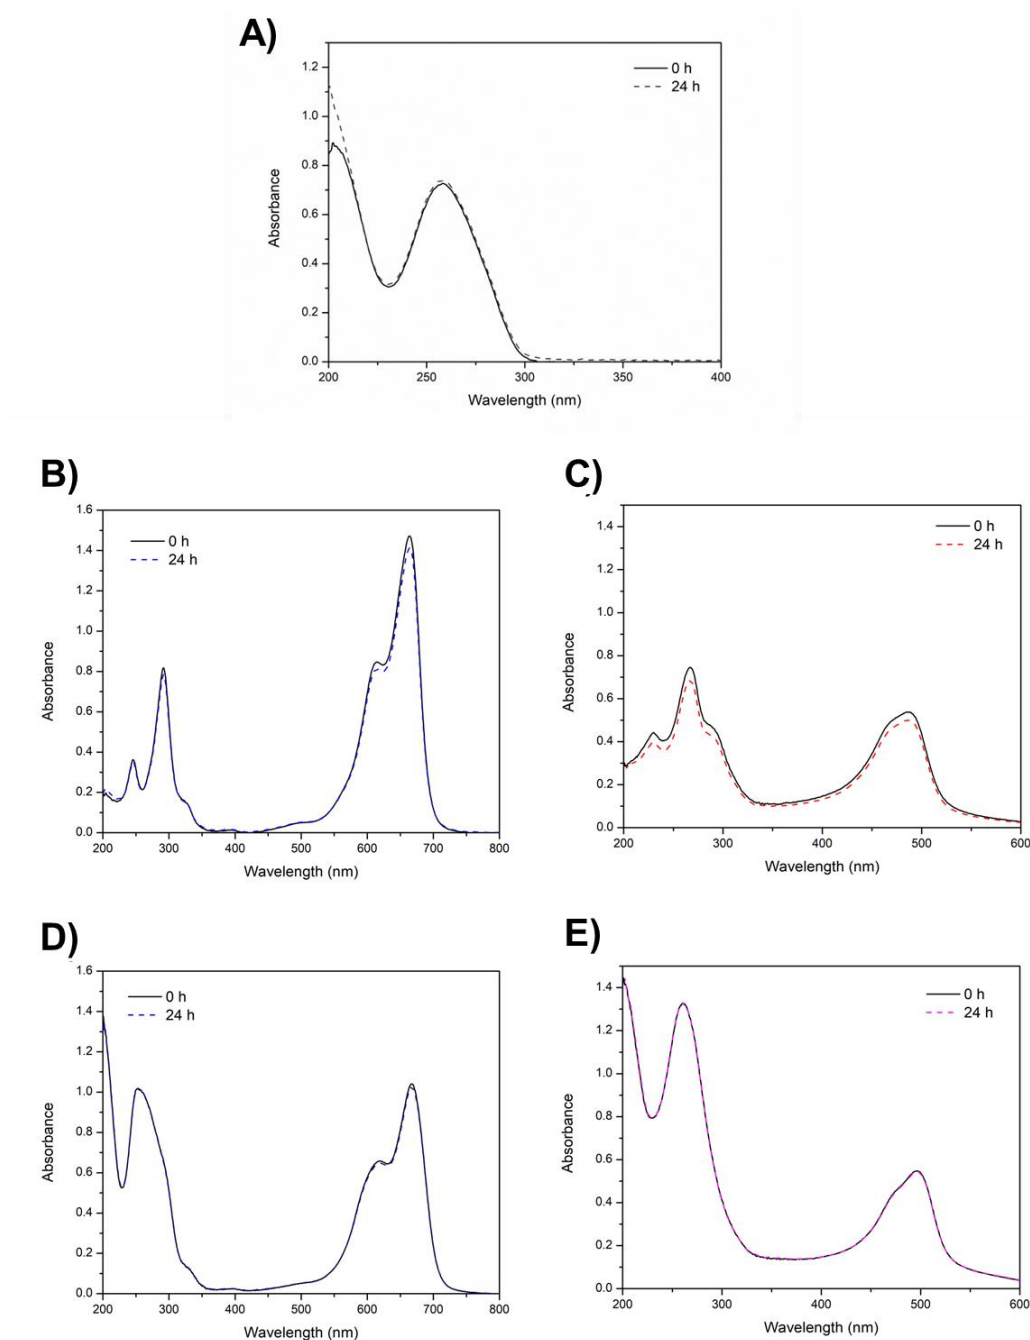

**Supplementary Figure S1:** Spectra of samples kept in the dark with measurements immediately after the preparation (0 hour) and 24 hours later: (A) DNA; (B) methylene blue; (C) acridine orange; (D) methylene blue with DNA; (E) acridine orange with DNA.
